# Supplementary material
Source: PubMed Central journal article supplement (PMC3596971)
Supplement: supp_blood-2012-01-407494_blood-2012-01-407494-1.pdf [file supp_blood-2012-01-407494_blood-2012-01-407494-1.pdf]

## Supplementary material

### Methods

#### *Quantification of endogenous murine VWF and N8-GP binding to murine VWF in vivo*

FVIII-deficient mice were dosed 280 U/kg N8-GP and blood samples isolated before, 24 h and 30 h after dosing as described under Pharmacokinetics in mice. Endogenous murine VWF was measured by Imubind<sup>®</sup> VWF ELISA (American Diagnostica). N8-GP complexed with endogenous murine VWF was quantified by ELISA using anti PEG-coated microtiter plates (Abcam, Epitomics) for catching and polyclonal anti VWF antibody for detection. Pools of five-fold diluted plasma from six mice were added and incubated 1 h. The plates were washed with PBS (Gibco) containing 0.05% Tween, and bound VWF detected with horse radish peroxidase-conjugated polyclonal anti-VWF antibody (DAKO) and TMB substrate (Kem-En-Tec). A calibration curve was made by spiking of defined concentrations (0, 0.03; 0.06; 0.012 and 0.25 nmol/L) of N8-GP to plasma from FVIII-deficient mice containing excess murine VWF.

#### *SDS-PAGE*

Samples for electrophoresis were prepared in lithium dodecyl sulphate (LDS) sample buffer (Invitrogen) containing 50 mM DTT and incubated at 56°C for 10 min. Electrophoresis were performed using 7% tris-acetate Pre-Cast Novex polyacrylamide gel with tris-acetate buffer (Invitrogen). Electrophoresis was carried out for 60 min at a limiting voltage of 150 V. The gels were either stained with coomassie using GelCode (Pierce) according to the manufacturer's description or by PEG staining as described by Kurfurst et al.

#### *Trypsin digest and RP-HPLC peptide map.*

Samples were buffer exchanged into 2 M urea, 50 mM Tris, 2 mM CaCl<sub>2</sub> and 8 mM methylamine, pH 7.8, using a NAP5 column (GE Healthcare) and incubated overnight at 37°C with porcine trypsin (Promega) at a ratio of 1:20 (w/w). The digests were terminated by acidification with trifluoroacetic acid (TFA). The peptides were separated by RP-HPLC using a Jupiter Proteo 90A column (2 x 250 mm, Phenomenex) using 0.06% TFA in water (solvent A) and 0.055% TFA in 90% acetonitrile (solvent B) and a linear gradient from 2.3-51.5% solvent B at 0-100 min, and 51.5-100% solvent B from 100-120 min. The column temperature was 40°C, flow rate 0.2 mL/min, and absorbance was detected at 215 nm.

### *Glycan analysis*

Samples were buffer exchanged into 2M urea, 10 mM EDTA, 25 mM  $\text{NH}_4\text{HCO}_3$  using a 50K Micron<sup>®</sup> centrifugal filter (Millipore). The buffer-exchanged sample was adjusted to 0.1% RapiGest<sup>™</sup> and digested by 1U PNGase F (Roche). Released glycans were purified on HyperSep Hypercarb SPE Plates with 10 mg bed weight; 1 mL column volume (Thermo Fisher Scientific). The wells were successively primed with 0.5 mL methanol, 0.5 mL 1M NaOH, 1 mL water, 1 mL 30% acetic acid, and 1 mL water before equilibration with 5% acetonitrile in 0.1 % (TFA). Subsequently, the PNGase F digests were loaded on the plate and rinsed with equilibration buffer. Glycans were eluted with 0.1% TFA in 50% acetonitrile and dried under a stream of nitrogen. Labelling reagent was prepared by dissolving 2-aminobenzamid (2-AB, 50 mg/mL) in 30% acetic acid in DMSO. Sodium cyanoborohydride (1.0 M) in Tetrahydrofuran (THF, Sigma) was added to the 2-AB solution at a ratio of 1:9 THF to 2-AB solution (vol:vol) before adding 5  $\mu\text{L}$  to the samples and incubating 3 hours at 65°C. Excess labelling reagent was removed with a 96 well MassPREP<sup>™</sup> Hydrophilic interaction chromatography (HILIC) plate (Waters) operated as described by the manufacturer. Briefly, the HILIC wells were rinsed with water and equilibrated with 90% acetonitrile. Labelled samples were adjusted to 80% acetonitrile prior to loading. The wells were rinsed with equilibration buffer and labelled glycans were eluted with 25  $\mu\text{L}$  10 mM ammonium citrate in 25% acetonitrile.

Glycan profiles were obtained by anion-exchange HPLC analysis on a CarboPac PA-100 column (Dionex Corporation) using 150 mM NaOH (eluent A) and 300 mM sodium acetate in 150 mM NaOH (eluent B). The chromatogram was developed using linear gradient from 0% to 35% eluent B over 52 minutes follow by 13 minutes regeneration of the column at 100% eluent B. The flow was 0.5 mL/min and 2-AB fluorescence was measured by excitation at 330 nm and emission at 420 nm.

### *N8-GP uptake by U87MG cells*

U87MG cells were obtained from American Type Culture Collection (ATCC no. HTB-14) and cultured in MEM with non-essential amino acids and sodium pyrovat (Gibco, 12492) supplemented with 10% (v/v) fetal calf serum, 100 units/mL penicillin, and 100 ug/mL streptomycin (Gibco) in tissue culture flasks and plates (Gibco) coated with bovine fibronectin (Sigma, 40 ug/mL in PBS). The medium was changed every 2nd or 3rd day and the cells passed once weekly by trypsination (0.25% trypsin, 1 mM EDTA in PBS). Cells were seeded in 48 well plates, and experiments

performed after 2 days when the cells had reached 95% confluence. Cells were washed with buffer A (100 mM HEPES, 150 mM NaCl, 4 KCl, 11 mM Glucose, pH 7.4) and incubated for 15 min at 37°C with buffer B (buffer A supplemented with 5 mM CaCl<sub>2</sub> and 1 mg/mL BSA). Some wells were pre-incubated for 5-10 min with receptor associated protein (RAP, 0.5 µM) prior to adding radioligand. Then, <sup>125</sup>I-N8-GP or <sup>125</sup>I-FVIII (turoctocog alfa) were added at a concentration of 2 nM alone or together with unlabelled N8-GP (225 nM), FVIII (225 nM or 1 µM) or VWF (25 or 50 nM), and incubated for 1 hour at 37°C. Cells were subsequently placed on ice and washed three times with cold buffer B to remove non-bound material. To separate surface-bound <sup>125</sup>I-FVIII from internalized, cells were incubated with 50 ug/mL trypsin (Sigma), 50 ug/mL proteinase K (Sigma), and 5 mM EDTA (Merck) in PBS for 60 min on ice. The cell suspension was centrifuged 5 min at 294×g at 4°C. The radioactivity in supernatants (surface bound material) and cell pellets (internalized material) were counted in a γ-counter (Cobra). Each experiment was performed in four replicates and the average values of each experiment used for calculating the mean and standard deviation.

**Table S1.** Endogenous murine VWF level and N8-GP – murine VWF complex after administration of 280 U/kg FVIII or N8-GP to FVIII-deficient mice.

| Time (h) | Endogenous mVWF (%) <sup>*</sup> |                      | N8-GP in complex with murine VWF (nmol/L) <sup>#</sup> | N8-GP concentration (nmol/L) <sup>§</sup> |
|----------|----------------------------------|----------------------|--------------------------------------------------------|-------------------------------------------|
|          | Mice receiving FVIII             | Mice receiving N8-GP |                                                        |                                           |
| 0        | 100                              | 100                  | 0                                                      | 0                                         |
| 24       | 68±12                            | 71±23                | 0.75                                                   | 0.96±0.11                                 |
| 30       | 115±45                           | 117±35               | 0.84                                                   | 0.80±0.10                                 |

<sup>\*</sup>) Values are expressed as % of the murine VWF level in each individual mouse before dosing. Data are mean and standard deviation from six mice

<sup>#</sup>) N8-GP - VWF complex was measured on a pool of plasma from six mice.

<sup>§</sup>) FVIII activity was measured in a chromogenic assay and values converted to molar concentration. Data are mean and standard deviation from six mice.

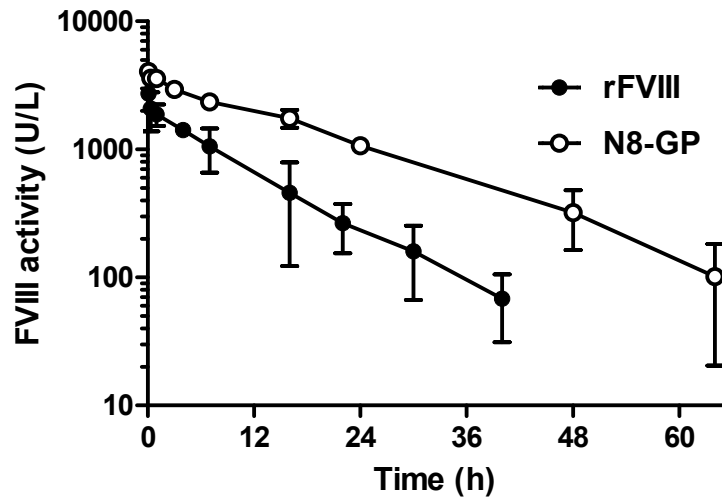

**Figure S1. Increased exposure of N8-GP in FVIII-deficient mice.** Mice were dosed i.v. with 280 U/kg FVIII (turoctocog alfa) or N8-GP. Blood was sampled at the indicated time points and FVIII concentration analyzed in a chromogenic assay. Data are mean and SD (n=3).

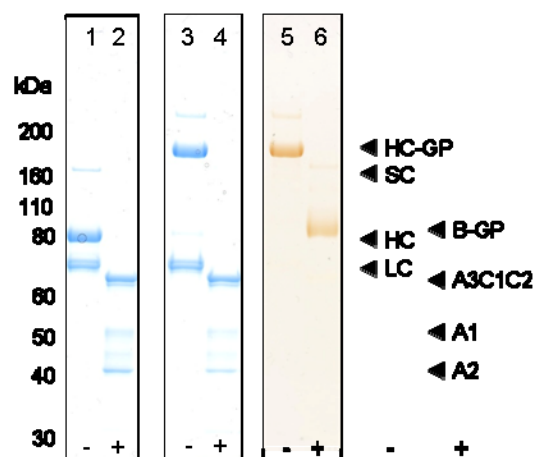

**Figure S2. SDS-PAGE of N8-GP and FVIII.** FVIII (turoctocog alfa, lane 1, 2) and N8-GP (lane 3-6) were analyzed by SDS-PAGE with (+) or without (-) prior cleavage with thrombin as indicated at the bottom of each lane. The gels were stained with coomassie (lane 1-4) or barium iodide that stain the PEG moiety (lane 5-6). Note that the 40K-PEGylated B-domain peptide (L-GP) released by thrombin cleavage migrates approximately as the heavy chain. The following fragments are indicated next to the gel. HC-GP: GlycoPEGylated heavy chain; SC: single chain FVIII; HC: Heavy chain; LC: Light chain; L-GP: GlycoPEGylated B-domain linker peptide; A3C1C2: Light chain without a3; A1: Heavy chain A1 domain and A2: Heavy chain A2 domain.

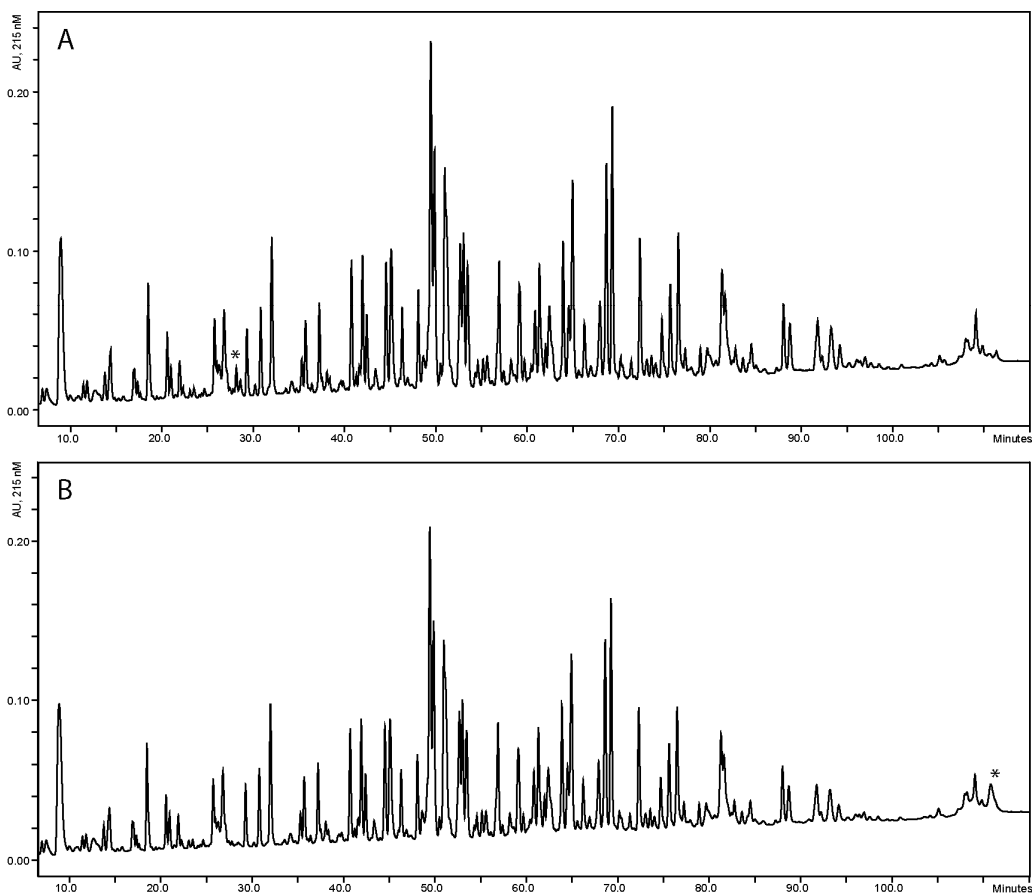

**Figure S3. Tryptic peptide map of FVIII and N8-GP.**

RP-HPLC peptide maps of FVIII (turoctocog alpha, A) and N8-GP (B) were comparable. The O-glycosylated peptide (His<sub>748</sub>-Lys<sub>757</sub>) is indicated by the asterisk in the two peptide maps. For FVIII the peptide elutes at 28 min whereas the glycoPEGylated peptide from N8-GP elutes at 111 min. The peptides identity has been confirmed by N-terminal amino acid sequencing.

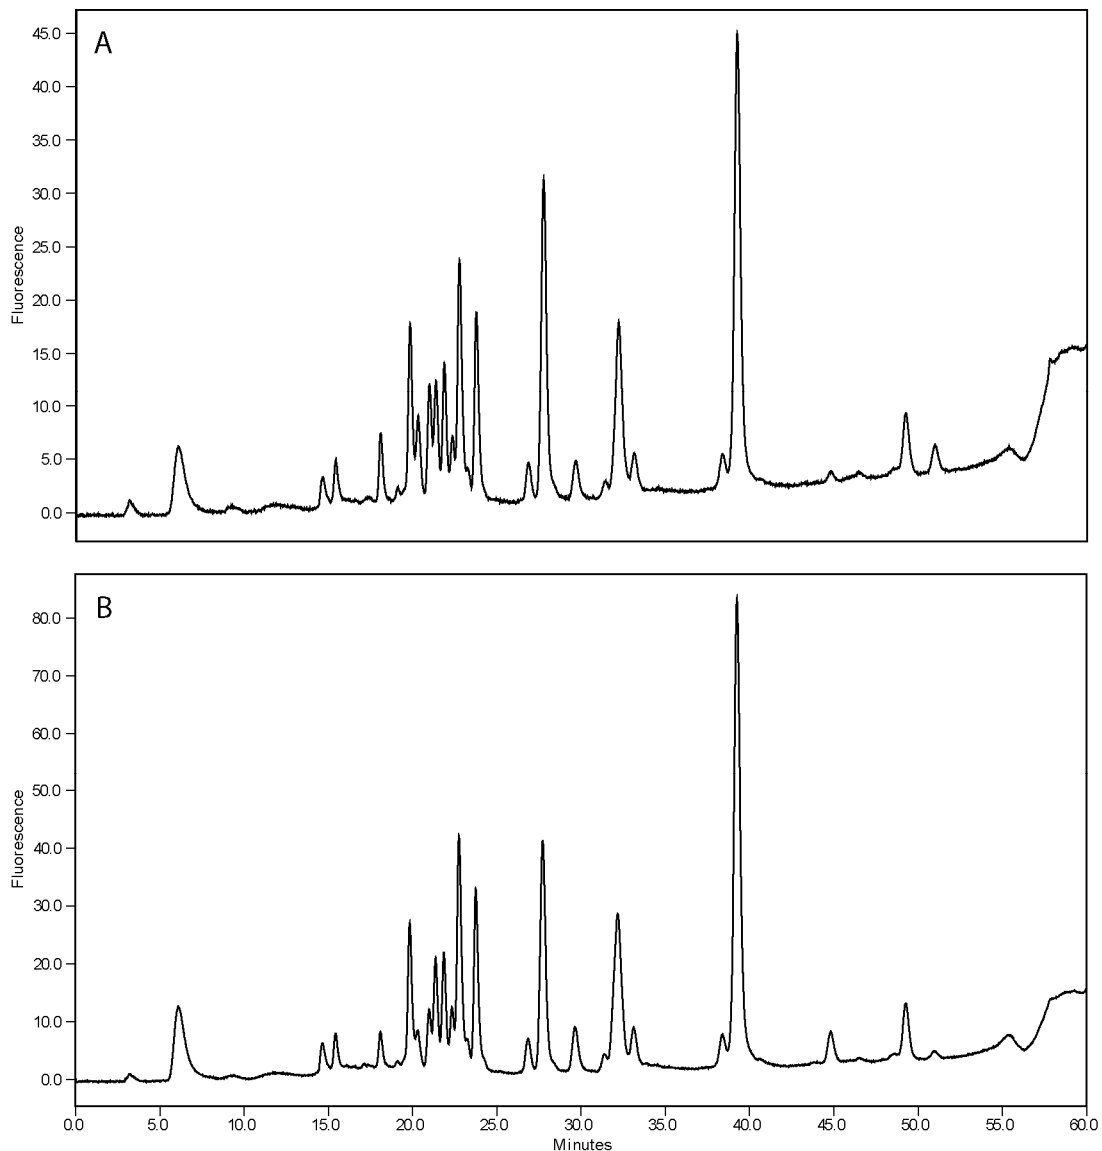

**Figure S4. Glycoprofiles of FVIII and N8-GP.** N-glycans from FVIII (turoctocog alfa, A) and N8-GP (B) were released by PNGase F digestion and labelled with 2-aminobenzamide before analysis by anion exchange HPLC. Neutral glycans eluted from 5 to 25 min and charged glycans with one or more sialic acid residues eluted later than 23 min. Minor variations were observed, i.e. a minor increase in the number of charged complex type glycans and a more than four-fold reduction of N-glycolylneuraminic acid eluting at 51 min. The ratio among high mannose type glycans and other neutral glycans (retention time 20-25 min) was consistent between FVIII and N8-GP.

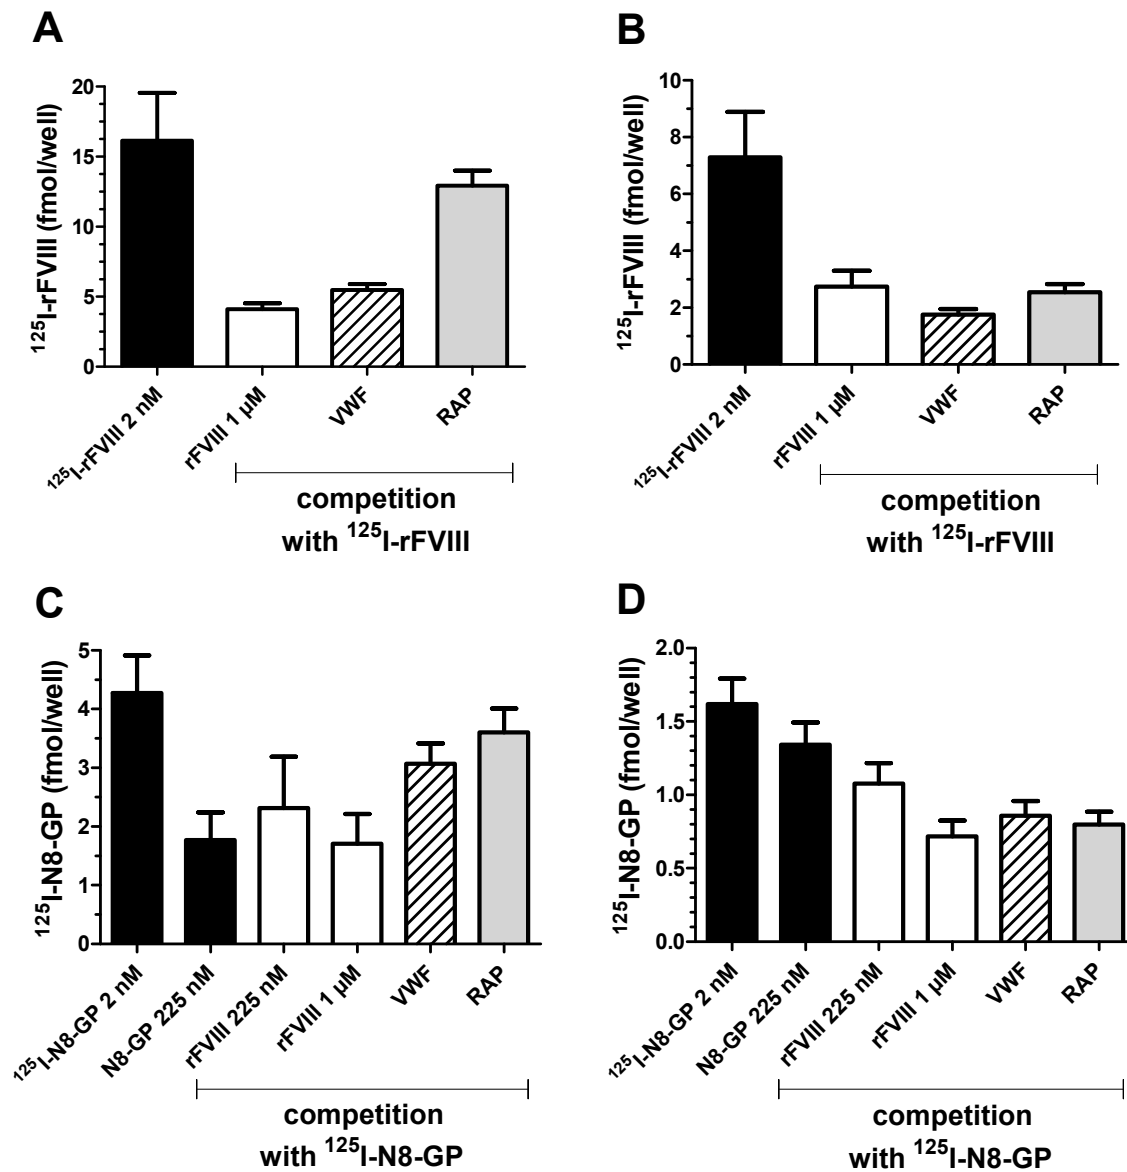

**Figure S5. Decreased cell binding of N8-GP compared to FVIII.** Data are mean and standard deviation (n=5) of  $^{125}\text{I-FVIII}$  (A, B) or  $^{125}\text{I-N8-GP}$  (C,D) binding (A,C) and internalization (B, D) in U87MG cells alone or in the presence of the noted competitors/binding proteins. Note that scales on y-axes are different. Five-fold less N8-GP compared to FVIII was bound to the cells. The LRP antagonist RAP inhibited internalization of both FVIII and N8-GP but had limited effect on binding.

## **Reference**

Kurfurst MM. Detection and molecular weight determination of polyethylene glycol- modified hirudin by staining after sodium dodecyl sulfate-polyacrylamide gel electrophoresis. Anal Biochem 1992; 200(2): 244-248.
